# Supplementary material for: Severity of lung involvement on chest X-rays in SARS-coronavirus-2 infected patients as a possible tool to predict clinical progression: an observational retrospective analysis of the relationship between radiological, clinical, and laboratory data
Source: PubMed Central journal article supplement — J Bras Pneumol. 2020 Sep-Oct;46(5):e20200226. doi: 10.36416/1806-3756/e20200226 (PMC7572267; doi:10.36416/1806-3756/e20200226), 2020
Supplement: 1806-3756-jbpneu-46-05-e20200226-suppl1.pdf [file 1806-3756-jbpneu-46-05-e20200226-suppl1.pdf]

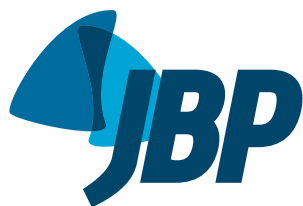

# Severity of lung involvement on chest X-rays in SARS-coronavirus-2 infected patients as a possible tool to predict clinical progression: an observational retrospective analysis of the relationship between radiological, clinical, and laboratory data

Elisa Baratella<sup>1</sup>, Paola Crivelli<sup>2</sup>, Cristina Marrocchio<sup>3</sup>,  
 Alessandro Marco Bozzato<sup>3</sup>, Andrea De Vito<sup>4</sup>, Giordano Madeddu<sup>4</sup>,  
 Laura Saderi<sup>5</sup>, Marco Confalonieri<sup>6</sup>, Luigi Tenaglia<sup>7</sup>, Maria Assunta Cova<sup>1</sup>

**Table S1.** Logistic regression analysis assessing the relationship of demographic, clinical, laboratory, and radiological variables with severe outcomes (intubation/noninvasive ventilation/death).

| Variable                                 | Univariate analysis       |                | Multivariate analysis |       |
|------------------------------------------|---------------------------|----------------|-----------------------|-------|
|                                          | OR (95% CI)               | p              | OR (95% CI)           | p     |
| Male                                     | 1.7 (0.8-3.3)             | 0.15           | 1.6 (0.5-6.0)         | 0.46  |
| Age, years                               | 1.4 (0.9-2.4)             | 0.17           | 0.9 (0.3-2.6)         | 0.87  |
| Current/former smoker                    | 1.1 (0.5-2.4)             | 0.76           | -                     | -     |
| Comorbidity                              | 1.2 (0.5-3.0)             | 0.68           | -                     | -     |
| BMI > 30 kg/m <sup>2</sup>               | 1.9 (0.8-4.9)             | 0.16           | -                     | -     |
| COPD                                     | 1.5 (0.5-4.3)             | 0.50           | -                     | -     |
| Diabetes                                 | 3.1 (1.4-6.8)             | 0.006          | 4.1 (1.0-16.9)        | 0.049 |
| Hypertension                             | 1.1 (0.6-2.2)             | 0.71           | -                     | -     |
| CHD                                      | 1.4 (0.6-3.2)             | 0.41           | -                     | -     |
| Liver disease                            | 1.9 (0.3-10.8)            | 0.46           | -                     | -     |
| Cancer                                   | 0.9 (0.4-2.2)             | 0.85           | -                     | -     |
| Kidney disease                           | 1.0 (0.4-2.5)             | 0.94           | -                     | -     |
| Immunodeficiency                         | -                         | -              | -                     | -     |
| Symptoms                                 | 2.2 (0.4-12.4)            | 0.38           | -                     | -     |
| Fever                                    | 1.8 (0.7-5.0)             | 0.25           | -                     | -     |
| Cough                                    | 1.7 (0.9-3.3)             | 0.13           | -                     | -     |
| Sputum                                   | 1.4 (0.5-3.9)             | 0.52           | -                     | -     |
| Dyspnea                                  | 3.0 (1.5-6.0)             | 0.002          | 1.5 (0.5-4.7)         | 0.54  |
| RT-PCR                                   | -                         | -              | -                     | -     |
| Chest X-ray score                        | No lung involvement       | -              | -                     | -     |
|                                          | Lung involvement, 1-25%   | 0.5 (0.3-1.1)  | -                     | -     |
|                                          | Lung involvement, 26-50%  | 0.7 (0.3-1.6)  | -                     | -     |
|                                          | Lung involvement, 51-75%  | 3.0 (1.2-7.7)  | -                     | -     |
|                                          | Lung involvement, 76-100% | 5.5 (1.5-20.0) | 2.0 (0.2-20.4)        | 0.54  |
| pH                                       | -                         | -              | -                     | -     |
| PaO <sub>2</sub> , mmHg                  | 1.0 (1.0-1.0)             | 0.18           | -                     | -     |
| PaCO <sub>2</sub> , mmHg                 | 0.9 (0.8-1.09)            | 0.05           | -                     | -     |
| SaO <sub>2</sub> , %                     | 0.8 (0.8-0.9)             | < 0.0001       | 0.9 (0.8-1.1)         | -     |
| HCO <sub>3</sub> <sup>-</sup> , mmol/L   | 1.0 (0.8-1.1)             | 0.56           | -                     | -     |
| PaO <sub>2</sub> /FiO <sub>2</sub> ratio | 0.98 (0.98-0.99)          | < 0.0001       | 1.0 (1.0-1.0)         | 0.65  |
| WBC/mL                                   | 1.0 (1.0-1.0)             | 0.04           | 1.0 (1.0-1.0)         | 0.48  |
| CRP, mg/L                                | 1.0 (1.0-1.0)             | 0.008          | 1.0 (1.0-1.0)         | 0.49  |
| Chest X-ray score                        | Lung involvement, 1-25%   | 0.3 (0.1-0.9)  | -                     | -     |
|                                          | Lung involvement, 26-50%  | 0.3 (0.1-1.0)  | -                     | -     |
|                                          | Lung involvement, 51-75%  | 1.7 (0.6-4.7)  | -                     | -     |
|                                          | Lung involvement, 76-100% | 3.6 (1.2-11.0) | -                     | -     |
| Mild hypoxia                             | 0.6 (0.2-1.4)             | 0.22           | -                     | -     |
| Moderate hypoxia                         | 35.6 (4.6-277.8)          | 0.001          | 19.0 (1.8-205.7)      | 0.02  |
| Severe hypoxia                           | 3.2 (0.8-12.4)            | 0.10           | -                     | -     |
| Oxygen therapy                           | 2.2 (1.1-4.6)             | 0.03           | -                     | -     |

BMI: body mass index; CHD: coronary heart disease; WBC: white blood cell; and CRP: C-reactive protein.

**Table S2.** Logistic regression analysis showing the relationship of demographic, clinical, laboratory, and radiological variables with the need for intubation.

| Variable                                 | Univariate analysis       |                | Multivariate analysis |       |
|------------------------------------------|---------------------------|----------------|-----------------------|-------|
|                                          | OR (95% CI)               | p              | OR (95% CI)           | p     |
| Male                                     | 4.8 (1.6-14.9)            | 0.006          | 1.1 (0.1-22.3)        | 0.96  |
| Age, years                               | 1.0 (1.0-1.0)             | 0.57           | 0.8 (0.7-1.0)         | 0.046 |
| Current/former smoker                    | 2.5 (1.1-6.0)             | 0.04           | 1.5 (0.1-16.8)        | 0.73  |
| Comorbidity                              | 0.8 (0.3-2.5)             | 0.76           | -                     | -     |
| BMI > 30 kg/m <sup>2</sup>               | 2.7 (1.0-7.3)             | 0.047          | 0.5 (0.0-9.8)         | 0.64  |
| COPD                                     | 1.6 (0.5-5.5)             | 0.46           | -                     | -     |
| Diabetes                                 | 3.2 (1.4-7.8)             | 0.009          | 94.7 (1.3-7,060.0)    | 0.04  |
| Hypertension                             | 1.1 (0.5-2.7)             | 0.78           | -                     | -     |
| CHD                                      | 2.3 (0.9-5.9)             | 0.08           | -                     | -     |
| Liver disease                            | 2.2 (0.4-12.5)            | 0.39           | -                     | -     |
| Cancer                                   | 0.5 (0.2-2.0)             | 0.35           | -                     | -     |
| Kidney disease                           | 0.4 (0.1-1.7)             | 0.19           | -                     | -     |
| Immunodeficiency                         | -                         | -              | -                     | -     |
| Symptoms                                 | -                         | -              | -                     | -     |
| Fever                                    | 4.9 (0.6-38.4)            | 0.13           | -                     | -     |
| Cough                                    | 1.6 (0.7-3.7)             | 0.29           | -                     | -     |
| Sputum                                   | 2.6 (0.9-7.8)             | 0.09           | -                     | -     |
| Dyspnea                                  | 2.2 (0.9-5.4)             | 0.09           | -                     | -     |
| RT-PCR                                   | -                         | -              | -                     | -     |
| Chest X-ray score                        | No lung involvement       | -              | -                     | -     |
|                                          | Lung involvement, 1-25%   | 0.7 (0.3-1.8)  | -                     | -     |
|                                          | Lung involvement, 26-50%  | 0.4 (0.1-1.3)  | -                     | -     |
|                                          | Lung involvement, 51-75%  | 2.0 (0.8-5.5)  | -                     | -     |
|                                          | Lung involvement, 76-100% | 3.1 (1.1-8.8)  | 0.4 (0.0-22.2)        | 0.65  |
| pH                                       | -                         | -              | -                     | -     |
| PaO <sub>2</sub> , mmHg                  | 0.97 (0.94-1.00)          | 0.03           | 0.9 (0.9-1.0)         | 0.11  |
| PaCO <sub>2</sub> , mmHg                 | 0.9 (0.8-1.0)             | 0.11           | -                     | -     |
| SaO <sub>2</sub> , %                     | 0.8 (0.8-0.9)             | < 0.0001       | 0.8 (0.6-1.0)         | 0.02  |
| HCO <sub>3</sub> , mmol/L                | 0.8 (0.7-1.0)             | 0.09           | -                     | -     |
| PaO <sub>2</sub> /FiO <sub>2</sub> ratio | 0.99 (0.99-1.00)          | 0.002          | 1.0 (1.0-1.0)         | 0.65  |
| WBC/mL                                   | 1.0 (1.0-1.0)             | 0.69           | -                     | -     |
| CRP, mg/L                                | 1.0 (1.0-1.0)             | 0.84           | -                     | -     |
| Chest X-ray                              | Lung involvement, 1-25%   | 0.1 (0.0-0.9)  | -                     | -     |
|                                          | Lung involvement, 26-50%  | 0.2 (0.0-1.4)  | -                     | -     |
|                                          | Lung involvement, 51-75%  | 0.7 (0.2-2.0)  | -                     | -     |
|                                          | Lung involvement, 76-100% | 7.9 (2.7-23.0) | < 0.0001              | -     |
| Mild hypoxia                             | 0.1 (0.0-0.8)             | 0.03           | -                     | -     |
| Moderate hypoxia                         | 28.5 (8.3-98.2)           | < 0.0001       | 55.4 (3.4-892.7)      | 0.005 |
| Severe hypoxia                           | 1.0 (0.3-4.1)             | 0.97           | -                     | -     |

BMI: body mass index; CHD: coronary heart disease; WBC: white blood cell; and CRP: C-reactive protein.

**Table S3.** Logistic regression analysis showing the relationship of demographic, clinical, laboratory, radiological variables with the need for noninvasive ventilation.

| Variables                                | Univariate analysis       |               | Multivariate analysis |         |
|------------------------------------------|---------------------------|---------------|-----------------------|---------|
|                                          | OR (95% CI)               | p-value       | OR (95% CI)           | p-value |
| Male                                     | 1.5 (0.7-3.3)             | 0.30          | 2.8 (0.0-184.6)       | 0.63    |
| Age, years                               | 1.0 (1.0-1.0)             | 0.18          | 1.0 (0.8-1.1)         | 0.69    |
| Current/former smoker                    | 1.1 (0.5-2.4)             | 0.89          | -                     | -       |
| Comorbidity                              | 1.1 (0.4-3.0)             | 0.88          | -                     | -       |
| BMI > 30 kg/m <sup>2</sup>               | 2.4 (1.0-6.1)             | 0.06          | -                     | -       |
| COPD                                     | 1.0 (0.3-3.2)             | 0.95          | -                     | -       |
| Diabetes                                 | 2.2 (1.0-4.9)             | 0.05          | -                     | -       |
| Hypertension                             | 0.9 (0.4-1.9)             | 0.82          | -                     | -       |
| CHD                                      | 0.3 (0.1-0.9)             | 0.03          | -                     | -       |
| Liver disease                            | 2.8 (0.5-14.5)            | 0.22          | -                     | -       |
| Cancer                                   | 0.9 (0.3-2.4)             | 0.78          | -                     | -       |
| Kidney disease                           | 0.5 (0.2-1.6)             | 0.24          | -                     | -       |
| Immunodeficiency                         | -                         | -             | -                     | -       |
| Symptoms                                 | -                         | -             | -                     | -       |
| Fever                                    | 7.2 (0.9-56.2)            | 0.06          | -                     | -       |
| Cough                                    | 1.8 (0.9-4.0)             | 0.12          | -                     | -       |
| Sputum                                   | 1.2 (0.4-3.7)             | 0.74          | -                     | -       |
| Dyspnea                                  | 1.2 (0.5-2.5)             | 0.71          | -                     | -       |
| RT-PCR                                   | -                         | -             | -                     | -       |
| Chest X-ray score                        | No lung involvement       | -             | -                     | -       |
|                                          | Lung involvement, 1-25%   | 1.0 (0.5-2.2) | -                     | -       |
|                                          | Lung involvement, 26-50%  | 0.9 (0.4-2.3) | -                     | -       |
|                                          | Lung involvement, 51-75%  | 1.6 (0.6-3.9) | -                     | -       |
|                                          | Lung involvement, 76-100% | 1.0 (0.3-3.1) | -                     | -       |
| pH                                       | -                         | -             | -                     | -       |
| PaO <sub>2</sub> , mmHg                  | 1.0 (1.0-1.0)             | 0.06          | -                     | -       |
| PaCO <sub>2</sub> , mmHg                 | 0.9 (0.8-1.0)             | 0.14          | -                     | -       |
| SaO <sub>2</sub> , %                     | 1.0 (0.9-1.1)             | 0.94          | -                     | -       |
| HCO <sub>3</sub> , mmol/L                | 1.1 (0.9-1.3)             | 0.49          | -                     | -       |
| PaO <sub>2</sub> /FiO <sub>2</sub> ratio | 1.0 (1.0-1.0)             | 0.049         | 1.0 (1.0-1.0)         | 0.12    |
| WBC/mL                                   | 1.0 (1.0-1.0)             | 0.24          | -                     | -       |
| CRP, mg/L                                | 1.0 (1.0-1.0)             | 0.01          | 1.0 (1.0-1.1)         | 1.00    |
| Chest X-ray                              | Lung involvement, 1-25%   | 0.7 (0.2-2.2) | -                     | -       |
|                                          | Lung involvement, 26-50%  | 0.5 (0.1-2.0) | -                     | -       |
|                                          | Lung involvement, 51-75%  | 1.9 (0.7-5.1) | -                     | -       |
|                                          | Lung involvement, 76-100% | 1.0 (0.4-2.5) | -                     | -       |
| Mild hypoxia                             | 1.9 (0.7-4.8)             | 0.20          | -                     | -       |
| Moderate hypoxia                         | 1.1 (0.4-3.1)             | 0.79          | -                     | -       |
| Severe hypoxia                           | 1.6 (0.5-5.3)             | 0.47          | -                     | -       |

BMI: body mass index; CHD: coronary heart disease; WBC: white blood cell; and CRP: C-reactive protein.

**Table S4.** Logistic regression analysis showing the relationship of demographic, clinical, laboratory, radiological variables with death.

| Variables                                |                           | Univariate analysis |          | Multivariate analysis |         |
|------------------------------------------|---------------------------|---------------------|----------|-----------------------|---------|
|                                          |                           | OR (95% CI)         | p-value  | OR (95% CI)           | p-value |
| Male                                     |                           | 0.8 (0.4-1.9)       | 0.65     | 0.8 (0.1-4.5)         | 0.80    |
| Age, years                               |                           | 1.1 (1.1-1.2)       | < 0.0001 | 1.1 (1.0-1.2)         | 0.03    |
| Current/former smoker                    |                           | 0.5 (0.2-1.4)       | 0.20     | -                     | -       |
| Comorbidity                              |                           | 3.1 (0.7-14.1)      | 0.14     | -                     | -       |
| BMI > 30 kg/m <sup>2</sup>               |                           | 0.3 (0.1-1.5)       | 0.14     | -                     | -       |
| COPD                                     |                           | 1.5 (0.4-5.1)       | 0.53     | -                     | -       |
| Diabetes                                 |                           | 1.6 (0.7-3.9)       | 0.29     | -                     | -       |
| Hypertension                             |                           | 2.3 (0.9-5.6)       | 0.07     | -                     | -       |
| CHD                                      |                           | 2.8 (1.1-7.1)       | 0.03     | 0.9 (0.2-4.5)         | 0.86    |
| Liver disease                            |                           | -                   | -        | -                     | -       |
| Cancer                                   |                           | 1.6 (0.6-4.5)       | 0.39     | -                     | -       |
| Kidney disease                           |                           | 2.7 (1.0-7.3)       | 0.05     | -                     | -       |
| Immunodeficiency                         |                           | -                   | -        | -                     | -       |
| Symptoms                                 |                           | -                   | -        | -                     | -       |
| Fever                                    |                           | 0.5 (0.2-1.3)       | 0.15     | -                     | -       |
| Cough                                    |                           | 0.8 (0.4-1.9)       | 0.61     | -                     | -       |
| Sputum                                   |                           | 0.8 (0.2-3.0)       | 0.75     | -                     | -       |
| Dyspnea                                  |                           | 2.7 (1.1-7.0)       | 0.04     | 1.3 (0.2-7.5)         | 0.75    |
| RT-PCR                                   |                           | -                   | -        | -                     | -       |
| Chest X-ray score                        | No lung involvement       | -                   | -        | -                     | -       |
|                                          | Lung involvement, 1-25%   | 0.3 (0.1-0.8)       | 0.02     | -                     | -       |
|                                          | Lung involvement, 26-50%  | 0.9 (0.3-2.5)       | 0.88     | -                     | -       |
|                                          | Lung involvement, 51-75%  | 1.3 (0.5-3.7)       | 0.61     | -                     | -       |
|                                          | Lung involvement, 76-100% | 7.1 (2.5-20.4)      | < 0.0001 | 2.9 (0.5-18.4)        | 0.26    |
| pH                                       |                           | -                   | -        | -                     | -       |
| PaO <sub>2</sub> , mmHg                  |                           | 0.93 (0.89-0.98)    | 0.002    | 1.0 (0.9-1.1)         | 0.73    |
| PaCO <sub>2</sub> , mmHg                 |                           | 1.0 (0.9-1.1)       | 0.77     | -                     | -       |
| SaO <sub>2</sub> , %                     |                           | 0.9 (0.9-1.0)       | 0.001    | 0.9 (0.8-1.0)         | 0.21    |
| HCO <sub>3</sub> , mmol/L                |                           | 0.9 (0.6-1.1)       | 0.15     | -                     | -       |
| PaO <sub>2</sub> /FiO <sub>2</sub> ratio |                           | 1.0 (1.0-1.0)       | 0.002    | 1.0 (1.0-1.0)         | 0.85    |
| WBC/mL                                   |                           | 1.0 (1.0-1.0)       | 0.002    | 1.0 (1.0-1.0)         | 0.93    |
| CRP, mg/L                                |                           | 1.0 (1.0-1.0)       | 0.08     | -                     | -       |
| Chest X-ray                              | Lung involvement, 1-25%   | -                   | -        | -                     | -       |
|                                          | Lung involvement, 26-50%  | -                   | -        | -                     | -       |
|                                          | Lung involvement, 51-75%  | 3.1 (0.8-12.6)      | 0.12     | -                     | -       |
|                                          | Lung involvement, 76-100% | 1.6 (0.4-6.5)       | 0.51     | -                     | -       |
| Mild hypoxia                             |                           | 0.1 (0.0-1.1)       | 0.06     | -                     | -       |
| Moderate hypoxia                         |                           | 2.2 (0.7-6.4)       | 0.17     | -                     | -       |
| Severe hypoxia                           |                           | 7.7 (2.2-27.3)      | 0.001    | 1.3 (0.1-23.1)        | 0.84    |

BMI: body mass index; CHD: coronary heart disease; WBC: white blood cell; and CRP: C-reactive protein.
